# Supplementary material
Source: publisher figshare collection journal article supplement (https://frontiersin.figshare.com/ndownloader/files/26920901)
Supplement: Supplementary file 1 [file 26920901]

**Supplementary Material**

**Coupling Hierarchical Ultrathin Co Nanosheets with N-doped Carbon Plate as High-Efficiency Oxygen Evolution Electrocatalysts**

**Yue Wang1, Meng Li1, Qixing Zhou2, Qin Wang1, Xingyuan Zhang1, Dongmei Sun1* and Yawen Tang1***

1Jiangsu key laboratory of New Power Batteries. Jiangsu Collaborative Innovation center of Biomedical Functional materials, School of Chemistry and Materials Science, Nanjing Normal University, 210023 Nanjing, China

2School of Chemistry and Chemical Engineering, Southeast University, Nanjing 211189, PR China.

* **Correspondence:** sundongmei@njnu.edu.cn (D. Sun); tangyawen@njnu.edu.cn (Y. Tang)

**Part I: Figures**


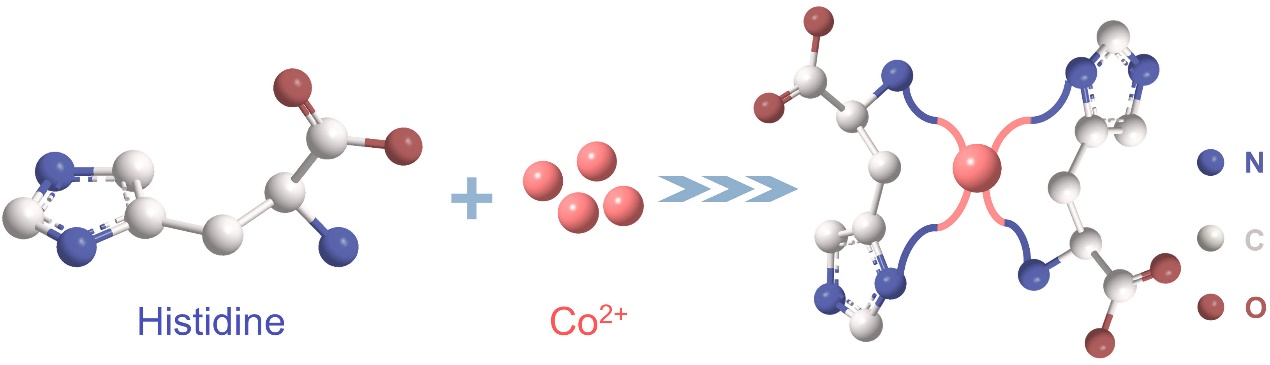


**Supplementary Figure 1.** Schematic interaction between histidine and Cobalt ion.


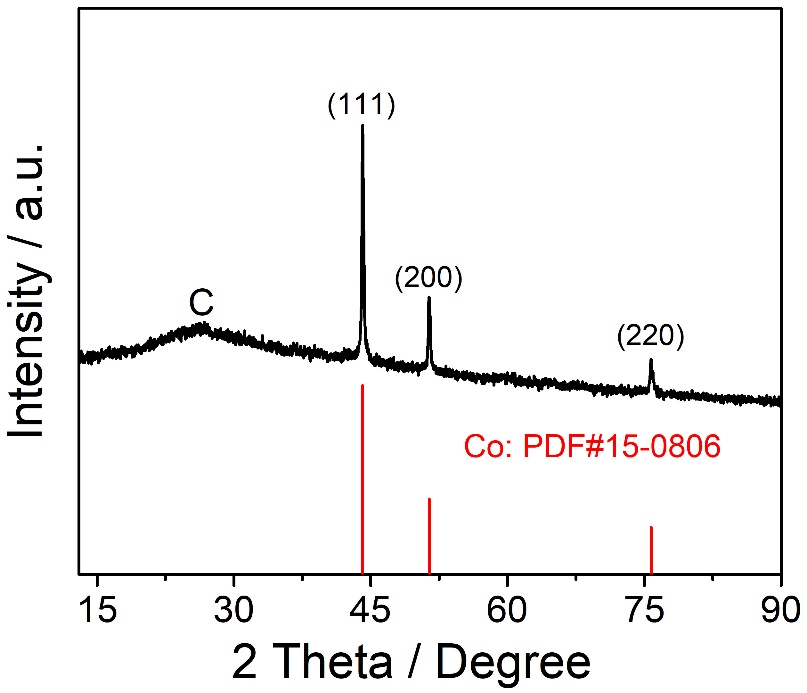


**Supplementary Figure 2.** XRD pattern of Co-NS@NCP-700 catalyst.


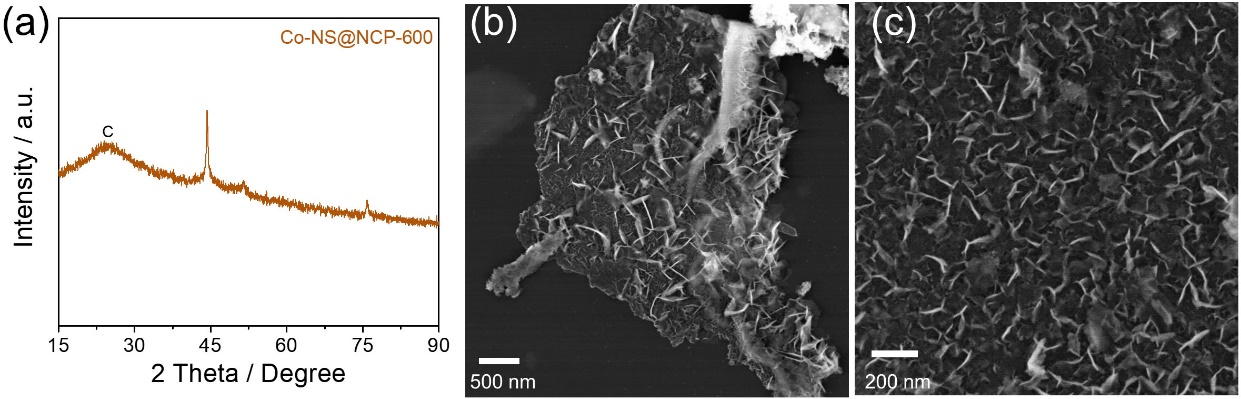


**Supplementary Figure 3.** (a) XRD pattern; and (b) SEM images of Co-NS@NCP-600 catalyst.


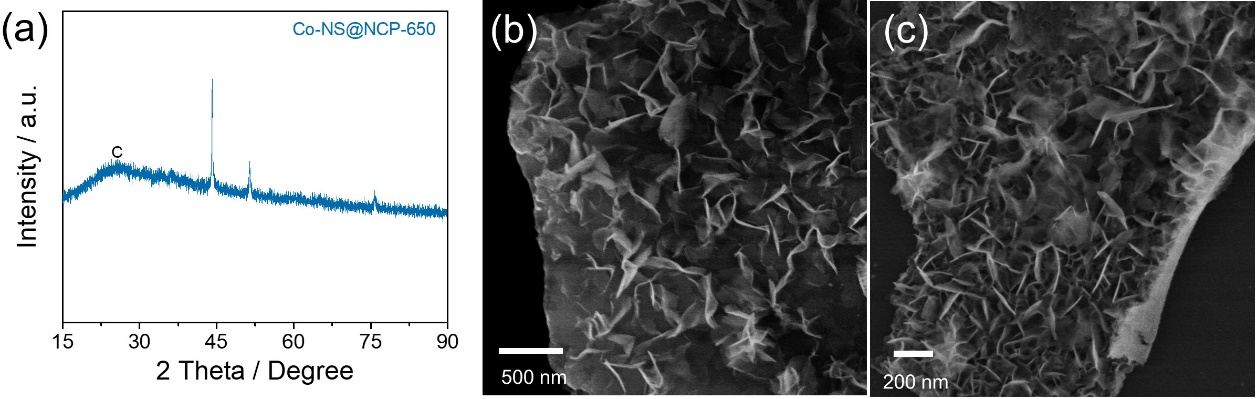


**Supplementary Figure 4.** (a) XRD pattern; and (b) SEM images of Co-NS@NCP-650 catalyst.


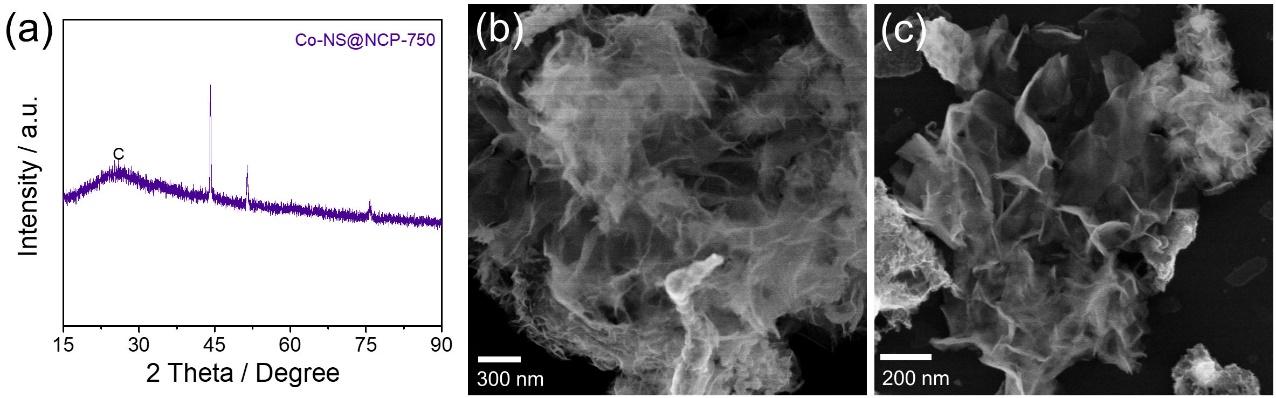


**Supplementary Figure 5.** (a) XRD pattern; and (b) SEM images of Co-NS@NCP-750 catalyst.


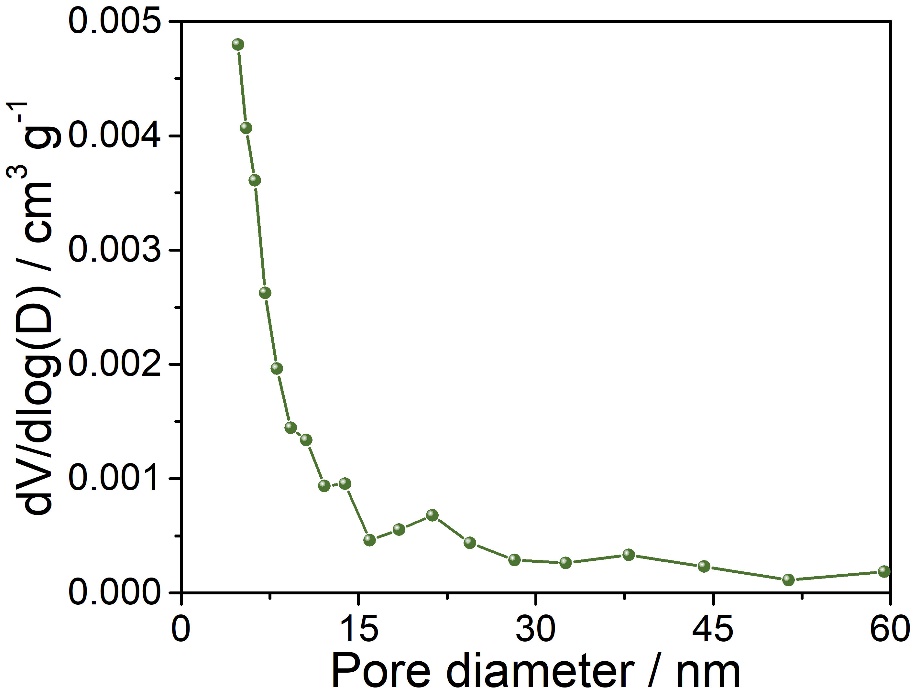


**Supplementary Figure 6.** pore-size distribution curve of Co-NS@NCP-700 catalyst.


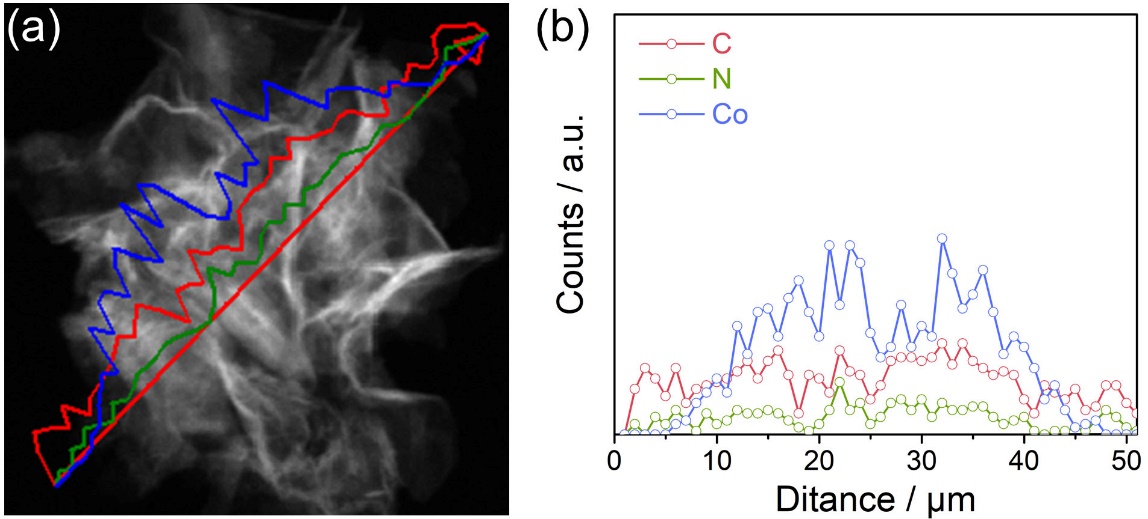


**Supplementary Figure 7.** (a)HAADF-STEM image; and (b) EDX line-scan profiles of Co-NS@NCP-700 catalyst.


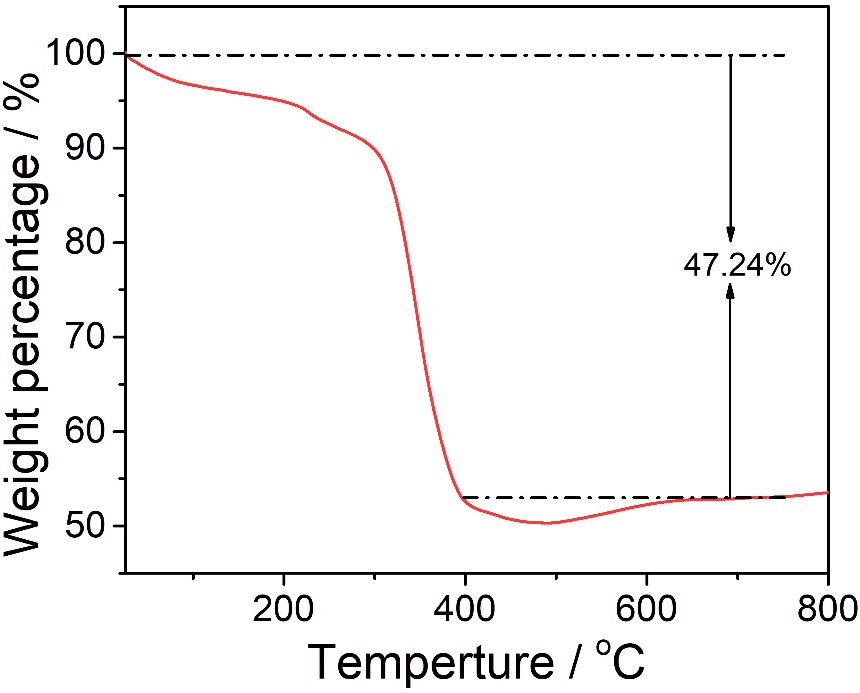


**Supplementary Figure 8.** TGA curve of Co-NS@NCP-700 catalyst.


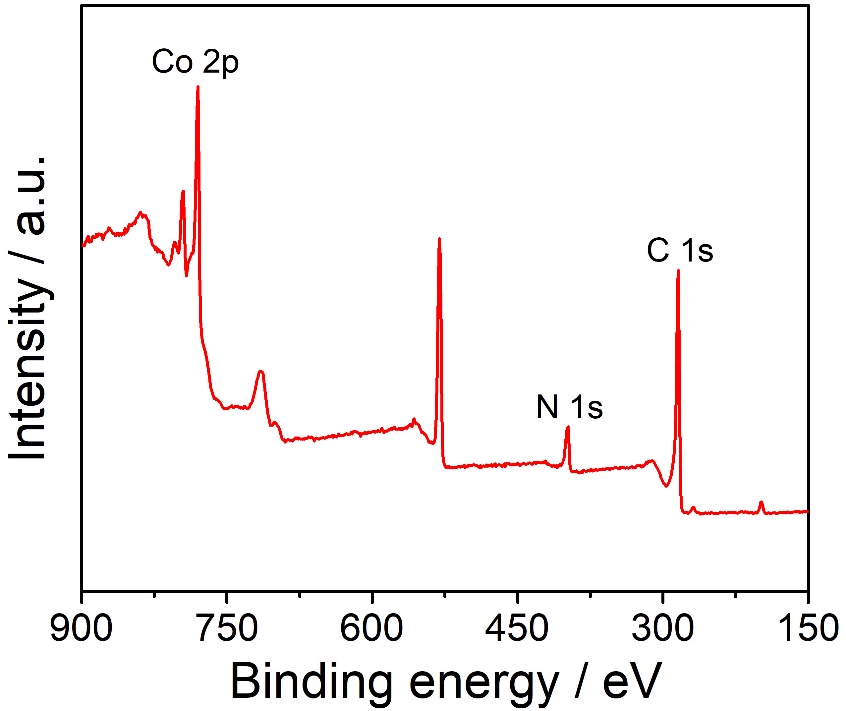


**Supplementary Figure 9.** The XPS survey scan spectrum of Co-NS@NCP-700 catalyst.


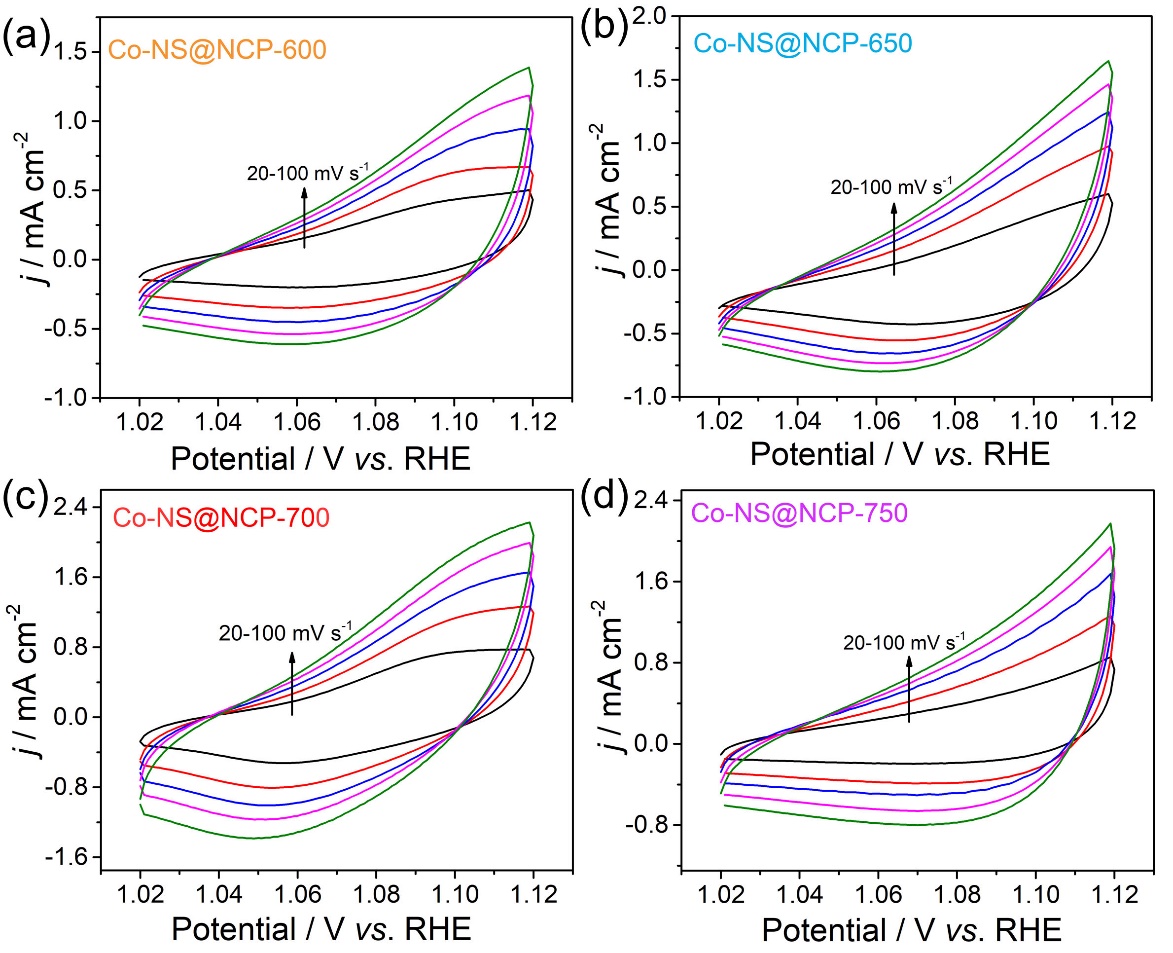


**Supplementary Figure 10.** CV curves of the synthesized Co-NS@NCP catalysts in the non-Faradaic region (-1 - 1.1 V) were obtained at different scanning rates. (a) Co-NS@NCP-600; (b) Co-NS@NCP-650; (c) Co-NS@NCP-700; and (d) Co-NS@NCP-750.


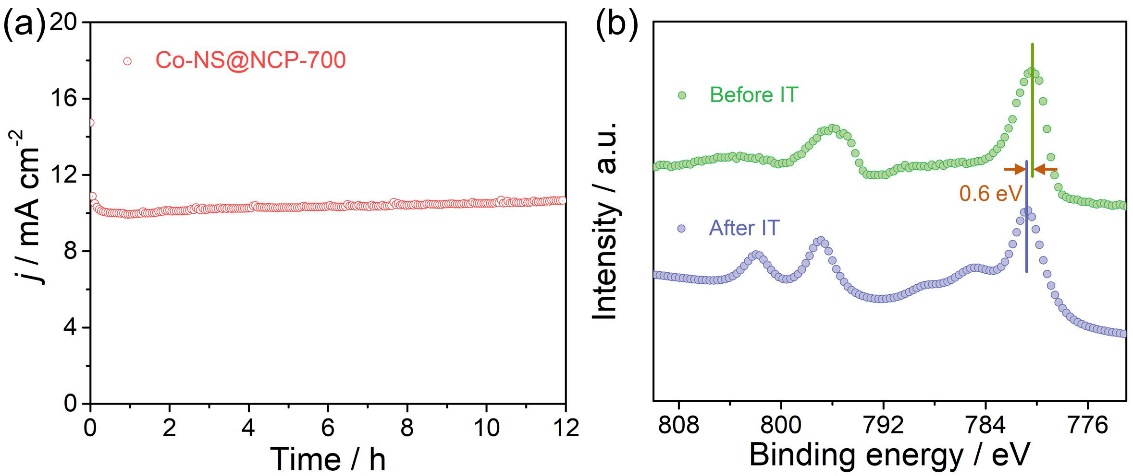


**Supplementary Figure 11.** (a) The chronopotentiometry curve at overpotential of 300 mV; and (b) High-resolution Co 2p XPS spectra of Co-NS@NCP-700 catalyst before and after *i*-*t* test.


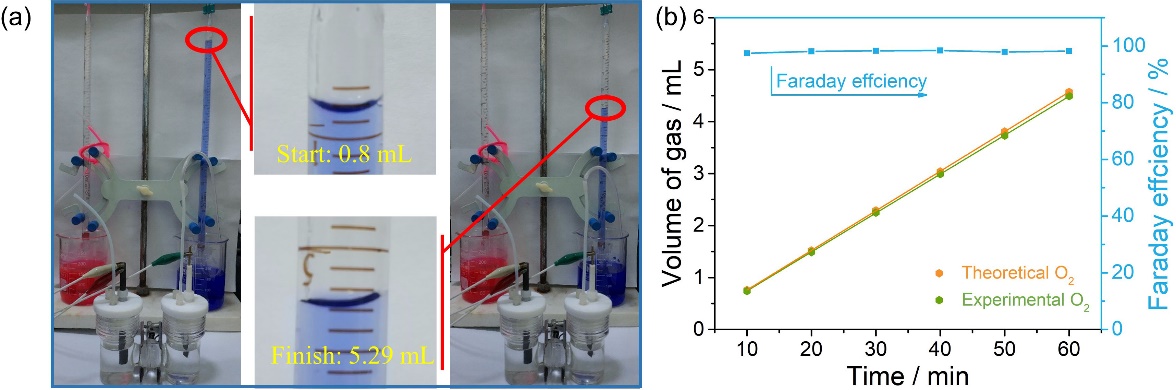


**Supplementary Figure 12.** Faraday efficiency of Co-NS@NCP-700 catalyst: (a) test process diagram; and (b) curves.

**Part II. Tables**

**Supplementary Table 1**. Comparison of OER performance of Co-NS@NCP-700 catalyst with some previously reported Co-based catalysts in 1.0 M KOH solution.

| Number | Catalyst | η *j* = 10 mA cm-2  / mV | Reference |
| --- | --- | --- | --- |
| 1 | Co-NS@NCP-700 | 278 | This work |
| 2 | NC-Co SA | 360 | *ACS Catal.* **2018**, 8, 8961−8969 |
| 3 | Co BTC-5wt% rGO | 290 | *Renewable Energy* **2020**, 156, 1040 |
| 4 | rGO@CoFe2O4 | 300 | *ACS Catal*. **2019**, 9, 3878−3887 |
| 5 | Co3O4/HNCP-40 | 333 | *ACS Catal.* **2018**, 8, 7879−7888 |
| 6 | CoNC-NB2 | 350 | *Small* **2020**, 16, 2001171 |
| 7 | Co NPS@CNT | 380 | *Applied Surface Science* **2020**, 507, 145155 |
| 8 | Co-UNMS | 400 | *ACS Catal*. **2018**, 8, 1913−1920 |
| 9 | Co/CoO | 350 | *ACS Energy Lett*. **2017**, 2, 1208−1213 |
| 10 | Co-NTMCs@NSC | 284 | *Nanoscale*, **2019**, 11, 21302 |
| 11 | Co3N@NA-CNCs | 280 | *Nano Res*. **2019**, 12, 1605–1611 |
| 12 | Co/CoP-5 | 340 | *Adv. Energy Mater*. **2017**, 7, 1602355 |
| 13 | FeCo/Co2P@NPCF | 330 | *Adv. Energy Mater*. **2020**, 10, 1903854. |
| 14 | CoOx-4h | 306 | *Nano Energy*, **2018**, 43, 110-116 |
| 15 | Co2P@NC-Fe2P-2 | 290 | *ACS Appl. Mater. Interfaces*, **2020**, 12, 25884 | |
| 16 | 3D CoS0.46P0.54 | 302 | *Small Methods*, **2020**, 2000043 |
| 17 | Co0.30CuOx | 290 | *ACS Catal.*, **2018**, 8, 12030-12040 |
| 18 | CoP-2 | 310 | *Adv. Funct. Mater.*,**2019**, 1905252 |
| 19 | CoP/NCNHP | 310 | *J. Am. Chem. Soc.*, **2018**, 140, 2610 |
| 20 | Ni-CoP@C | 279 | *Nano Energy,***2019**, 62, 136-143 |
